# Supplementary material for: Head-to-head comparison of aggressive conventional therapy and three biological treatments and comparison of two de-escalation strategies in patients who respond to treatment: study protocol for a multicenter, randomized, open-label, blinded-assessor, phase 4 study
Source: Springer Nature journal article supplement (doi:10.1186/s13063-017-1891-x), 2017-04-04
Supplement: MOESM2 [file 12199888]

**Spin-off projects in the NORD-STAR study**

| <b>Project</b>                                       | <b>Conducting site</b> |
|------------------------------------------------------|------------------------|
| Bone density                                         | Gothenburg, Sweden     |
| B-cells                                              | Gothenburg, Sweden     |
| Regulatory T-cells                                   | Gothenburg, Sweden     |
| Hand strength and functionality                      | Gothenburg, Sweden     |
| The degree of inflammation in joints                 | Linköping, Sweden      |
| Magnetic resonance imaging (MRI)                     | Copenhagen, Denmark    |
| Coagulation-inflammatory pathways                    | Solna, Sweden          |
| Cotinine and smoking status                          | Solna, Sweden          |
| Musculoskeletal ultrasound                           | Oslo, Norway           |
| Physical function and health related quality of life | Oslo, Norway           |
